# Supplementary material
Source: PubMed Central journal article supplement (PMC8692496)
Supplement: 41396_2021_1048_MOESM2_ESM.pdf [file 41396_2021_1048_MOESM2_ESM.pdf]

## Supplementary information II

1

2

3 Index:

4 **Table S1.** Sequences used for phylogenetic analysis of pOCC/eHao/NrfA genes

5 **Table S2.** Sequences used for phylogenetic analysis of NapA genes

6 **Table S3.** Sequences used for phylogenetic analysis of NapD genes

7 **Table S4.** Sequences used for phylogenetic analysis of NapF genes

8 **Table S5.** Transcript levels of the 100 most highly expressed genes of *Ca. Electronema* sp. GS

9 **Table S6.** Number of reads mapped to the 40 nrfA gene fragments and to the pOCC gene

10 **Table S7.** Number of reads mapped to the 16 nirK gene fragments

11 **Table S8.** Number of reads mapped to the 63 nirS gene fragments

12

13 **Table S1: Accession numbers/gene identifiers for all sequences used for phylogenetic analysis of**  
 14 **pOCC/eHao/NrfA genes (Fig. S4).**

| Species Name                                  | Gene identifier [IMG/NCBI ID] |
|-----------------------------------------------|-------------------------------|
| Candidatus Electronema sp. GS                 | TAA75457.1                    |
| Candidatus Electrothrix aarhusiensis MCF      | RWX43088.1                    |
| Candidatus Electrothrix marina A5             | RWX50766.1                    |
| Actinobacillus pleuropneumoniae S8            | 2552278133                    |
| Actinobacillus succinogenes 130Z              | 640807619                     |
| Actinobacillus ureae ATCC 25976               | 650340686                     |
| Ammonifex degensii KC4                        | 646359879                     |
| Anaerococcus prevotii ACS-065-V-Col13         | 2529738369                    |
| Anaerolinea thermophila UNI-1                 | 649906650                     |
| Bacillus sp. 1NLA3E                           | 2506744287                    |
| Bacteroidetes bacterium GWA2_31_9             | 2721822901                    |
| Beggiatoa sp. "Orange Guaymas"                | 2502838749                    |
| Caldilinea aerophila STL-6-01, DSM 14535      | 2513225030                    |
| Calditrichaeota bacterium                     | RMH60699.1                    |
| Caminiobacter mediatlanticus                  | WP_007473950.1                |
| Campylobacter curvus                          | WP_011992073.1                |
| Campylobacter fetus                           | WP_002849252.1                |
| Campylobacter hominis ATCC BAA-381            | 640869848                     |
| Campylobacter jejuni jejuni NCTC 11168        | 637040891                     |
| Candidatus Cloacimonetes bacterium            | PCJ16198.1                    |
| Candidatus Magnetoovum chiemensis             | KJR43854.1                    |
| Candidatus Thiomargarita nelsonii S10         | KHD11702.2                    |
| Candidatus Thioglobus autotrophicus           | WP_053951924.1                |
| Candidatus Thioglobus sp. EF1                 | ALE52942.1                    |
| Capnocytophaga gingivalis JCVIHMP016          | 644450706                     |
| Citrobacter koseri ATCC BAA-895               | 640917778                     |
| Comamonadaceae bacterium EBPR                 | 2619975620                    |
| Corynebacterium pseudotuberculosis CCUG 27541 | 2628297476                    |
| Delisea pulchra                               | 2617265124                    |
| Delta proteobacterium MLMS-1                  | EAT04113.1                    |
| Desulfosporosinus meridiei S10                | 2510242216                    |
| Desulfovibrio desulfuricans ATCC 27774        | 643580866                     |
| Desulfovibrio salexigens DSM 2638             | 644838886                     |
| Desulfovibrio vulgaris Hildenborough          | 637121843                     |
| Desulfurispirillum indicum S5                 | 649844489                     |
| Desulfurivibrio alkaliphilus AHT2             | ADH84778.1                    |
| endosymbiont of Riftia pachyptila             | EGV52177.1                    |
| Escherichia coli HS                           | 640923413                     |
| Gallibacterium anatis DSM 16844               | 2514917813                    |

|                                               |                |
|-----------------------------------------------|----------------|
| Geobacter uraniumreducens Rf4                 | WP_011940785.1 |
| Grimontia hollisae CIP 101886                 | 647235545      |
| Haemophilus influenzae 2019                   | 2630849089     |
| Lentisphaerae bacterium RIFOXYB12_FULLL_65_16 | 2716626204     |
| Marivirga tractuosa DSM 4126                  | 649787403      |
| Meiothermus silvanus DSM 9946                 | 646843608      |
| Myxococcus xanthus DK 1622                    | 638023578      |
| Nautilia profundicola                         | WP_015902282.1 |
| Nitrospiraceae bacterium                      | RJR18741.1     |
| Nitrospirae bacterium JdFR-81                 | 2730372430     |
| Oceanospirillales bacterium SCGC AD-311-B11v3 | 2701081706     |
| Omnitrophica WOR_2 bacterium GWA2_45_18       | 2721786119     |
| Opiritatus terrae PB90-1                      | 641694276      |
| Pelobacter carbinolicus DSM 2380              | 637752476      |
| Photobacterium profundum SS9                  | 637585967      |
| Planctomycetes bacterium                      | RKY19412.1     |
| Planctomyces brasiliensis DSM 5305            | 649980400      |
| Planctomyces maris DSM 8797                   | 641112668      |
| Porphyromonas gingivalis W83                  | 637150428      |
| Prevotella marshii DSM 16973                  | 648809557      |
| Propionivibrio dicarboxylicus DSM 5885        | SDI64766.1     |
| Providencia alcalifaciens DSM 30120           | 643148102      |
| Riemerella anatipestifer DSM 15868            | 649778058      |
| Selenomonas sputigena ATCC 35185              | 646081185      |
| Shewanella oneidensis MR-1                    | 637345732      |
| Shewanella sediminis HAW-EB3                  | WP_012144695.1 |
| Sulfurospirillum deleyianum DSM 6946          | 646423959      |
| Thioalkalivibrio nitratireducens DSM 14787    | 2521963319     |
| Thioalkalivibrio paradoxus ARh 1              | 2513007479     |
| Thioalkalivibrio thiocyanoxidans ARh 4        | 2506728454     |
| Vibrio fischeri ES114                         | 637636232      |
| Vibrio fluvialis I21563                       | 2546700336     |
| Vibrio harveyi ATCC 25919                     | 2583678091     |
| Wolinella succinogenes DSM 1740               | 637456212      |
| Yersinia enterocolitica YEA                   | 2611555138     |
| Aeromonas hydrophila ATCC 7966                | 639715039      |
| Bacillus subtilis                             | KOS70037.1     |

17 **Table S2: Accession numbers/gene identifiers for all sequences used for phylogenetic analysis of NapA genes**  
 18 **(Fig. S1).**

| Species Name                                   | Gene identifier [IMG/NCBI ID] |
|------------------------------------------------|-------------------------------|
| Candidatus Electronema sp. GS                  | 2729874203                    |
| Aggregatibacter actinomycetemcomitans DSM 8324 | 2515250942                    |
| Anaeromyxobacter dehalogenans 2CP-C            | ABC80683.1                    |
| Azospirillum brasilense sp7                    | 2599104047                    |
| Azospirillum brasilense sp7                    | 2599101664                    |
| Bordetella bronchiseptica RB50                 | CAE33292.1                    |
| Bordetella parapertussis 12822                 | Q7W733.1                      |
| Bradyrhizobium japonicum USDA 110              | 637374628                     |
| Burkholderia xenovorans LB400                  | 637953004                     |
| Campylobacter jejuni jejuni NCTC 11168         | YP_002344187.1                |
| Candidatus Desulfuromonas soudanensis WTL      | 2609285564                    |
| Cupriavidus necator pHG1                       | 640427642                     |
| Cystobacter violaceus Cb vi76                  | 2592593039                    |
| Dechloromonas aromatica RCB                    | 637681987                     |
| Desulfitobacterium hafniense DCB-2             | ACL19345.1                    |
| Desulfobulbus japonicus DSM 18378              | WP_028579228.1                |
| Desulfobulbus mediterraneus                    | WP_028585221.1                |
| Desulfobulbus propionicus DSM 2032             | ADW17542.1                    |
| Desulfocapsa sulfexigens DSM 10523             | AGF79815.1                    |
| Desulfocapsa sulfexigens                       | WP_015405499.1                |
| Desulfovibrio desulfuricans ATCC 27774         | ACL48525.1                    |
| Desulfurivibrio alkaliphilus AHT2              | 646847134                     |
| Dissulfuribacter thermophilus S69              | OCC14250.1                    |
| Escherichia coli DH1                           | 646935360                     |
| Geobacter lovleyi SZ                           | ACD94779.1                    |
| Geobacter pickeringii G13                      | AJE02263.1                    |
| Haemophilus ducreyi ATCC 33940                 | 2599173274                    |
| Haemophilus influenzae F3047                   | 649868883                     |
| Helicobacter hepaticus ATCC 51449              | Q7VJT5.1                      |
| Kryptonium sp. JGI-4                           | 2599799712                    |
| Kryptonium sp. JGI-6                           | 2600397245                    |
| Kryptonium sp. JGI-23                          | 2601849902                    |
| Magnetospirillum magneticum AMB-1              | 637821302                     |
| Paracoccus denitrificans PD1222                | ABL72782.1                    |
| Paracoccus pantotrophus DSM 1403               | SFY43853.1                    |
| Pasteurella multocida 36950                    | 2512391891                    |
| Photobacterium profundum SS9                   | 637585562                     |
| Photobacterium profundum SS9                   | 637586736                     |

|                                                             |                |
|-------------------------------------------------------------|----------------|
| <i>Pseudomonas aeruginosa</i> PAO1                          | 637051567      |
| <i>Pseudomonas</i> sp. G-179                                | AAD46689.1     |
| <i>Ralstonia eutropha</i> JMP134                            | 637694190      |
| <i>Ralstonia metallidurans</i> CH34                         | 637979487      |
| <i>Rhizobium</i> sp. CF142                                  | WP_007818974.1 |
| <i>Rhodobacter sphaeroides</i> 2.4.1                        | ABA81591.1     |
| <i>Salmonella enterica enterica</i> sv. Choleraesuis SC-B67 | 637641152      |
| <i>Salmonella typhimurium</i> LT2                           | 637212978      |
| <i>Sedimenticola selenatireducens</i> AK4OH1                | 2513982609     |
| <i>Sinorhizobium meliloti</i>                               | AIM03004.1     |
| <i>Shewanella frigidimarina</i> NCIMB 400                   | ABI70414.1     |
| <i>Shewanella oneidensis</i> MR-1                           | AAN53924.1     |
| <i>Shigella flexneri</i> CCH060                             | 2531700739     |
| <i>Sinorhizobium meliloti</i> RMO17                         | 2598504540     |
| <i>Sorangium cellulosum</i> 'So ce 56'                      | 641348992      |
| <i>Sulfurospirillum barnesii</i> SES-3                      | 2507135060     |
| <i>Symbiobacterium thermophilum</i> IAM 14863               | BAD39902.1     |
| <i>Thermosulfurimonas dismutans</i>                         | OAQ21381.1     |
| <i>Vibrio vulnificus</i> ATCC 43382                         | 2662388500     |
| <i>Wolinella succinogenes</i> DSM 1740                      | 637456405      |
| <i>Bacillus subtilis</i>                                    | WP_124073427.1 |
| <i>Synechococcus elongatus</i> PCC 7942                     | CAA52675.1     |

---

19

20

21 **Table S3: Accession numbers/gene identifiers for all sequences used for phylogenetic analysis of NapD genes**  
 22 **(Fig. S2).**

| Species Name                                   | Gene identifier [IMG/NCBI ID] |
|------------------------------------------------|-------------------------------|
| Candidatus Electronema sp. GS                  | 2729874204                    |
| Candidatus Electronema sp. GS                  | 2729874205                    |
| Desulfurivibrio alkaliphilus AHT2              | 646847137                     |
| Aggregatibacter actinomycetemcomitans DSM 8324 | 2515250943                    |
| Anaeromyxobacter dehalogenans 2CP-C            | ABC80682.1                    |
| Azospirillum brasilense sp7                    | 2599104048                    |
| Azospirillum brasilense sp7                    | 2599101665                    |
| Bordetella bronchiseptica RB50                 | CAE33291.1                    |
| Bordetella parapertussis 12822                 | 637109774                     |
| Bradyrhizobium japonicum USDA 110              | 637374627                     |
| Burkholderia xenovorans LB400                  | 637953003                     |
| Campylobacter jejuni jejuni NCTC 11168         | CAL34913.1                    |
| Candidatus Desulfuromonas soudanensis WTL      | 2609285565                    |
| Cupriavidus necator pHG1                       | 640427641                     |
| Dechloromonas aromatica RCB                    | 637681988                     |
| Desulfitobacterium hafniense DCB-2             | 643561198                     |
| Desulfobulbus japonicus DSM 18378              | WP_028579227.1                |
| Desulfobulbus propionicus DSM 2032             | ADW17543.1                    |
| Desulfocapsa sulfexigens DSM 10523             | AGF78837.1                    |
| Desulfovibrio desulfuricans ATCC 27774         | ACL48526.1                    |
| Desulfurivibrio alkaliphilus AHT2              | 646847137                     |
| Escherichia coli DH1                           | 646935359                     |
| Geobacter lovleyi SZ                           | ACD94778.1                    |
| Geobacter pickeringii G13                      | AJE02262.1                    |
| Haemophilus ducreyi ATCC 33940                 | 2599173275                    |
| Haemophilus influenzae F3047                   | 649868884                     |
| Helicobacter hepaticus ATCC 51449              | 637431176                     |
| Kryptonium sp. JGI-4                           | 2599799715                    |
| Kryptonium sp. JGI-6                           | 2600397248                    |
| Magnetospirillum magneticum AMB-1              | BAE51495.1                    |
| Paracoccus denitrificans PD1222                | ABL72781.1                    |
| Paracoccus pantotrophus                        | SFY43855.1                    |
| Pasteurella multocida 36950                    | 2512391890                    |
| Photobacterium profundum SS9                   | 637585561                     |
| Pseudomonas aeruginosa PAO1                    | 637051568                     |
| Pseudomonas sp. G-179                          | AAD46688.1                    |
| Ralstonia metallidurans CH34                   | 637979488                     |
| Rhizobium sp. CF142                            | EJJ28403.1                    |

|                                                      |            |
|------------------------------------------------------|------------|
| Rhodobacter sphaeroides 2.4.1                        | 640069464  |
| Salmonella enterica enterica sv. Choleraesuis SC-B67 | 637641153  |
| Salmonella typhimurium LT2                           | 637212979  |
| Sedimenticola selenatireducens AK4OH1                | 2513982608 |
| Shewanella frigidimarina NCIMB 400                   | ABI72396.1 |
| Shewanella oneidensis MR-1                           | AAN53925.1 |
| Shigella flexneri CCH060                             | 2531700738 |
| Sinorhizobium meliloti RMO17                         | 2598504539 |
| Sulfurospirillum barnesii SES-3                      | 2507135066 |
| Symbiobacterium thermophilum IAM 14863               | 637537430  |
| Wolinella succinogenes DSM 1740                      | 637456399  |

---

23

24

25 **Table S4: Accession numbers/gene identifiers for all sequences used for phylogenetic analysis of NapF genes**  
 26 **(Fig. S3).**

| Species Name                             | Gene identifier [IMG/NCBI ID] |
|------------------------------------------|-------------------------------|
| Candidatus Electronema sp. GS            | 2729874206                    |
| Candidatus Electrothrix aarhusiensis MCF | 2608444788                    |
| Candidatus Electrothrix marina A3        | 2609183527                    |
| Aggregatibacter segnis                   | WP_109859830.1                |
| Arcobacter sp. CECT 8986                 | WP_128990985.1                |
| Avibacterium avium                       | WP_115250139.1                |
| Azospirillum brasilense sp7              | 2599104049                    |
| Azovibrio restrictus                     | WP_026685580.1                |
| Beggiatoa sp. 4572                       | OQY57412.1                    |
| Candidatus Accumulibacter sp.            | TLD45631.1                    |
| Denitromonas halophilus                  | WP_144176374.1                |
| Enterovibrio coralii                     | WP_067418395.1                |
| Escherichia coli DH1                     | 646935358                     |
| Haemophilus ducreyi ATCC 33940           | 2599173276                    |
| Haemophilus influenzae F3047             | 649868885                     |
| Hydrogenimonas thermophila               | WP_092910301.1                |
| Magnetospira sp. QH-2                    | WP_046020781.1                |
| Magnetospirillum magneticum AMB-1        | 637821304                     |
| Pasteurella multocida 36950              | 2512391889                    |
| Pectobacterium peruvienne                | WP_048259758.1                |
| Pectobacterium zantedeschiae             | WP_129706134.1                |
| Photobacterium profundum SS9             | 637585560                     |
| Pseudomonas aeruginosa PAO1              | 637051569                     |
| Pseudomonas sp. G-179                    | AAD46687.1                    |
| Rhizobium sp. CF142                      | WP_007818978.1                |
| Rhodocyclaceae bacterium                 | TXG88186.1                    |
| Rodentibacter ratti                      | WP_077497317.1                |
| Salmonella typhimurium LT2               | 637212980                     |
| Sedimenticola selenatireducens AK4OH1    | 2513982607                    |
| Shewanella frigidimarina NCIMB 400       | ABI71179.1                    |
| Shewanella oneidensis MR-1               | AAN54718.1                    |
| Shigella flexneri CCH060                 | 2531700737                    |
| Sinorhizobium meliloti RMO17             | 2598504538                    |
| Solemya elarraichensis gill symbiont     | WP_078476978.1                |
| Sulfuricella denitrificans               | WP_148290815.1                |
| Sulfurospirillum barnesii SES-3          | 2507135064                    |
| Vibrio vulnificus ATCC 43382             | 2662388498                    |
| Wolinella succinogenes DSM 1740          | 637456401                     |



27 **Table S5: Transcript levels (RPKM) and differential transcription (DESeq2) of the 100 most highly**  
 28 **expressed genes of Ca. Electronema sp. GS. DNRA genes are highlighted.**

| Rank | IMG Gene ID | Locus Tag        | Gene Product Name                                               | Average RPKM under nitrate-reducing conditions | log2 fold Change between oxic control and nitrate amendme nt | Adj. p value |
|------|-------------|------------------|-----------------------------------------------------------------|------------------------------------------------|--------------------------------------------------------------|--------------|
| 1    | 2729874347  | Ga0183576_10762  | PilA                                                            | 107488                                         | -1.12                                                        | 1.00         |
| 2    | 2729875496  | Ga0183576_13321  | hypothetical protein                                            | 37779                                          | 0.81                                                         | 1.00         |
| 3    | 2729875974  | Ga0183576_16010  | cytochrome c                                                    | 36783                                          | 0.41                                                         | 1.00         |
| 4    | 2729875937  | Ga0183576_1578   | hypothetical protein                                            | 35366                                          | 1.52                                                         | 0.96         |
| 5    | 2729874243  | Ga0183576_10656  | hypothetical protein                                            | 29243                                          | -2.78                                                        | 0.65         |
| 6    | 2729874606  | Ga0183576_1117   | hypothetical protein                                            | 25514                                          | 0.34                                                         | 1.00         |
| 7    | 2729874008  | Ga0183576_10443  | Putative peptidoglycan binding domain-containing protein        | 19765                                          | 0.29                                                         | 1.00         |
| 8    | 2729875690  | Ga0183576_14111  | hypothetical protein                                            | 19659                                          | -0.11                                                        | 1.00         |
| 9    | 2729875544  | Ga0183576_13513  | hypothetical protein                                            | 16289                                          | -0.58                                                        | 1.00         |
| 10   | 2729873391  | Ga0183576_10111  | cold-shock DNA-binding protein family                           | 16178                                          | 0.66                                                         | 1.00         |
| 11   | 2729873390  | Ga0183576_10110  | cold-shock DNA-binding protein family                           | 13896                                          | -0.57                                                        | 1.00         |
| 12   | 2729874498  | Ga0183576_10928  | hypothetical protein                                            | 12838                                          | 0.37                                                         | 1.00         |
| 13   | 2729875691  | Ga0183576_14112  | hypothetical protein                                            | 12251                                          | -2.02                                                        | 0.98         |
| 14   | 2729875791  | Ga0183576_14613  | hypothetical protein                                            | 11553                                          | -0.14                                                        | 1.00         |
| 15   | 2729874205  | Ga0183576_10618  | periplasmic nitrate reductase chaperone NapD                    | 11247                                          | 2.16                                                         | 0.97         |
| 16   | 2729874203  | Ga0183576_10616  | periplasmic nitrate reductase subunit NapA apoprotein           | 11063                                          | 1.09                                                         | 1.00         |
| 17   | 2729875033  | Ga0183576_11921  | tRNA 2-thiouridine synthesizing protein E                       | 11022                                          | 0.95                                                         | 1.00         |
| 18   | 2729874199  | Ga0183576_10612  | pOCC                                                            | 10387                                          | 0.76                                                         | 1.00         |
| 19   | 2729874502  | Ga0183576_10932  | hypothetical protein                                            | 10266                                          | 0.11                                                         | 1.00         |
| 20   | 2729874460  | Ga0183576_10883  | hypothetical protein                                            | 9917                                           | 1.68                                                         | 0.76         |
| 21   | 2729874759  | Ga0183576_11353  | Opacity protein                                                 | 9686                                           | 0.78                                                         | 1.00         |
| 22   | 2729873817  | Ga0183576_102205 | cold-shock DNA-binding protein family                           | 9540                                           | 1.78                                                         | 0.76         |
| 23   | 2729874596  | Ga0183576_11052  | hypothetical protein                                            | 9508                                           | -0.84                                                        | 1.00         |
| 24   | 2729875792  | Ga0183576_14614  | 4Fe-4S dicluster domain-containing protein                      | 9457                                           | 0.35                                                         | 1.00         |
| 25   | 2729874206  | Ga0183576_10619  | periplasmic nitrate reductase maturation protein NapF           | 8988                                           | 1.83                                                         | 1.00         |
| 26   | 2729875357  | Ga0183576_12812  | hypothetical protein                                            | 8953                                           | -0.22                                                        | 1.00         |
| 27   | 2729875626  | Ga0183576_1392   | pyrroloquinoline quinone biosynthesis protein D                 | 8725                                           | -0.74                                                        | 1.00         |
| 28   | 2729874566  | Ga0183576_11022  | protein of unknown function (DUF4360)                           | 8432                                           | 1.85                                                         | 0.89         |
| 29   | 2729873552  | Ga0183576_101173 | hypothetical protein                                            | 8273                                           | -0.90                                                        | 1.00         |
| 30   | 2729873752  | Ga0183576_102140 | LSU ribosomal protein L10P                                      | 8041                                           | 0.86                                                         | 1.00         |
| 31   | 2729874198  | Ga0183576_10611  | hypothetical protein                                            | 7954                                           | -1.03                                                        | 1.00         |
| 32   | 2729875893  | Ga0183576_1535   | hypothetical protein                                            | 7912                                           | 0.13                                                         | 1.00         |
| 33   | 2729873736  | Ga0183576_102124 | dissimilatory adenylylsulfate reductase beta subunit            | 7383                                           | 0.04                                                         | 1.00         |
| 34   | 2729873441  | Ga0183576_10161  | Dissimilatory sulfite reductase D (DsrD)                        | 7310                                           | 0.44                                                         | 1.00         |
| 35   | 2729874204  | Ga0183576_10617  | periplasmic nitrate reductase chaperone NapD                    | 7118                                           | 2.22                                                         | 0.98         |
| 36   | 2729873786  | Ga0183576_102174 | SSU ribosomal protein S4P                                       | 7036                                           | 0.55                                                         | 1.00         |
| 37   | 2729874424  | Ga0183576_10847  | integration host factor subunit beta                            | 6979                                           | 0.16                                                         | 1.00         |
| 38   | 2729873757  | Ga0183576_102145 | SSU ribosomal protein S7P                                       | 6792                                           | -0.04                                                        | 1.00         |
| 39   | 2729874342  | Ga0183576_10757  | type IV pilus assembly protein PilW                             | 6786                                           | -0.03                                                        | 1.00         |
| 40   | 2729874202  | Ga0183576_10615  | ferredoxin-type protein NapG                                    | 6696                                           | 0.97                                                         | 1.00         |
| 41   | 2729873774  | Ga0183576_102162 | small subunit ribosomal protein S14                             | 6654                                           | 0.14                                                         | 1.00         |
| 42   | 2729873784  | Ga0183576_102172 | small subunit ribosomal protein S13                             | 6594                                           | -0.22                                                        | 1.00         |
| 43   | 2729875627  | Ga0183576_1393   | hypothetical protein                                            | 6565                                           | -0.52                                                        | 1.00         |
| 44   | 2729876010  | Ga0183576_1637   | protein refolding chaperone Spy/CpxP family                     | 6469                                           | 1.51                                                         | 1.00         |
| 45   | 2729875938  | Ga0183576_1579   | conserved repeat domain-containing protein                      | 6393                                           | 0.52                                                         | 1.00         |
| 46   | 2729873766  | Ga0183576_102154 | LSU ribosomal protein L22P                                      | 6281                                           | 0.40                                                         | 1.00         |
| 47   | 2729873765  | Ga0183576_102153 | SSU ribosomal protein S19P                                      | 6153                                           | -0.37                                                        | 1.00         |
| 48   | 2729873773  | Ga0183576_102161 | LSU ribosomal protein L5P                                       | 6105                                           | 0.11                                                         | 1.00         |
| 49   | 2729873761  | Ga0183576_102149 | LSU ribosomal protein L3P                                       | 5695                                           | 0.41                                                         | 1.00         |
| 50   | 2729875790  | Ga0183576_14612  | hypothetical protein                                            | 5618                                           | 0.95                                                         | 1.00         |
| 51   | 2729875517  | Ga0183576_13418  | Chemoreceptor zinc-binding domain-containing protein            | 5599                                           | -0.80                                                        | 1.00         |
| 52   | 2729875936  | Ga0183576_1577   | hypothetical protein                                            | 5557                                           | -1.23                                                        | NA           |
| 53   | 2729873737  | Ga0183576_102125 | dissimilatory adenylylsulfate reductase alpha subunit precursor | 5542                                           | 0.16                                                         | 1.00         |

|     |            |                  |                                                                                 |      |       |      |
|-----|------------|------------------|---------------------------------------------------------------------------------|------|-------|------|
| 54  | 2729873628 | Ga0183576_10216  | hypothetical protein                                                            | 5520 | -1.23 | 1.00 |
| 55  | 2729873772 | Ga0183576_102160 | large subunit ribosomal protein L24                                             | 5453 | 0.26  | 1.00 |
| 56  | 2729873767 | Ga0183576_102155 | SSU ribosomal protein S3P                                                       | 5255 | 0.45  | 1.00 |
| 57  | 2729876009 | Ga0183576_1636   | protein of unknown function (DUF4405)                                           | 5130 | 1.29  | 1.00 |
| 58  | 2729874874 | Ga0183576_1164   | hypothetical protein                                                            | 5022 | 0.12  | 1.00 |
| 59  | 2729875244 | Ga0183576_12431  | Protein of unknown function (DUF3106)                                           | 4929 | -1.13 | 1.00 |
| 60  | 2729873775 | Ga0183576_102163 | SSU ribosomal protein S8P                                                       | 4912 | -0.12 | 1.00 |
| 61  | 2729873763 | Ga0183576_102151 | LSU ribosomal protein L23P                                                      | 4874 | 0.64  | 1.00 |
| 62  | 2729873994 | Ga0183576_10429  | hypothetical protein                                                            | 4783 | -0.83 | 1.00 |
| 63  | 2729874712 | Ga0183576_1136   | D-alanyl-D-alanine carboxypeptidase (penicillin-binding protein 5/6)            | 4742 | 1.36  | 1.00 |
| 64  | 2729874102 | Ga0183576_10531  | transcriptional regulator, MucR family                                          | 4710 | -0.20 | 1.00 |
| 65  | 2729874459 | Ga0183576_10882  | hypothetical protein                                                            | 4699 | 1.64  | 0.92 |
| 66  | 2729874605 | Ga0183576_1116   | hypothetical protein                                                            | 4621 | -0.40 | 1.00 |
| 67  | 2729874340 | Ga0183576_10755  | PilX N-terminal                                                                 | 4597 | 0.89  | 1.00 |
| 68  | 2729875483 | Ga0183576_1338   | SSU ribosomal protein S21P                                                      | 4589 | 0.77  | 1.00 |
| 69  | 2729873785 | Ga0183576_102173 | SSU ribosomal protein S11P                                                      | 4513 | 0.62  | 1.00 |
| 70  | 2729874200 | Ga0183576_10613  | periplasmic nitrate reductase subunit NapB                                      | 4490 | 0.45  | 1.00 |
| 71  | 2729875622 | Ga0183576_13819  | mRNA interferase YafQ                                                           | 4465 | -2.08 | 0.92 |
| 72  | 2729874323 | Ga0183576_10738  | hypothetical protein                                                            | 4441 | 0.31  | 1.00 |
| 73  | 2729873985 | Ga0183576_10420  | integration host factor subunit alpha                                           | 4329 | -0.62 | 1.00 |
| 74  | 2729873758 | Ga0183576_102146 | translation elongation factor 2 (EF-2/EF-G)                                     | 4263 | -0.01 | 1.00 |
| 75  | 2729875693 | Ga0183576_14114  | hypothetical protein                                                            | 4176 | -0.45 | 1.00 |
| 76  | 2729873987 | Ga0183576_10422  | hypothetical protein                                                            | 4138 | 1.08  | 1.00 |
| 77  | 2729873776 | Ga0183576_102164 | large subunit ribosomal protein L6                                              | 4109 | -0.07 | 1.00 |
| 78  | 2729873787 | Ga0183576_102175 | DNA-directed RNA polymerase subunit alpha                                       | 3881 | 0.51  | 1.00 |
| 79  | 2729875722 | Ga0183576_14220  | manganese-dependent inorganic pyrophosphatase                                   | 3820 | -0.13 | 1.00 |
| 80  | 2729873751 | Ga0183576_102139 | LSU ribosomal protein L1P                                                       | 3793 | 0.07  | 1.00 |
| 81  | 2729873778 | Ga0183576_102166 | SSU ribosomal protein S5P                                                       | 3776 | 0.13  | 1.00 |
| 82  | 2729874463 | Ga0183576_10886  | Uncharacterized conserved protein YkwD, contains CAP (CSP/antigen 5/PR1) domain | 3756 | -0.22 | 1.00 |
| 83  | 2729873745 | Ga0183576_102133 | translation elongation factor 1A (EF-1A/EF-Tu)                                  | 3705 | 0.13  | 1.00 |
| 84  | 2729873993 | Ga0183576_10428  | hypothetical protein                                                            | 3643 | -1.36 | 0.98 |
| 85  | 2729875666 | Ga0183576_14017  | LSU ribosomal protein L13P                                                      | 3639 | 0.71  | 1.00 |
| 86  | 2729874304 | Ga0183576_10719  | hemoglobin                                                                      | 3634 | 0.83  | 1.00 |
| 87  | 2729875208 | Ga0183576_12331  | Putative beta-barrel porin 2                                                    | 3624 | -0.78 | 1.00 |
| 88  | 2729875284 | Ga0183576_12610  | chaperonin GroES                                                                | 3578 | 1.20  | 0.62 |
| 89  | 2729875916 | Ga0183576_1555   | outer membrane protein                                                          | 3530 | -1.55 | 1.00 |
| 90  | 2729875283 | Ga0183576_1269   | chaperonin GroEL                                                                | 3508 | 0.86  | 1.00 |
| 91  | 2729873762 | Ga0183576_102150 | LSU ribosomal protein L4P                                                       | 3507 | -0.08 | 1.00 |
| 92  | 2729873749 | Ga0183576_102137 | transcription antitermination protein nusG                                      | 3503 | -0.22 | 1.00 |
| 93  | 2729873753 | Ga0183576_102141 | LSU ribosomal protein L12P                                                      | 3413 | 0.79  | 1.00 |
| 94  | 2729873764 | Ga0183576_102152 | LSU ribosomal protein L2P                                                       | 3403 | 0.39  | 1.00 |
| 95  | 2729875667 | Ga0183576_14018  | SSU ribosomal protein S9P                                                       | 3354 | 0.55  | 1.00 |
| 96  | 2729874201 | Ga0183576_10614  | ferredoxin-type protein NapH                                                    | 3235 | 1.88  | 0.96 |
| 97  | 2729873760 | Ga0183576_102148 | SSU ribosomal protein S10P                                                      | 3192 | 0.40  | 1.00 |
| 98  | 2729874739 | Ga0183576_11333  | hypothetical protein                                                            | 3147 | 0.23  | 1.00 |
| 99  | 2729873783 | Ga0183576_102171 | bacterial translation initiation factor 1 (bIF-1)                               | 3113 | 0.65  | 1.00 |
| 100 | 2729874509 | Ga0183576_10939  | SSU ribosomal protein S1P                                                       | 3073 | 0.12  | 1.00 |

30 **Table S6. Number of reads mapped to each of the 40 *nrfA* gene fragments and to the pOCC gene identified**  
 31 **in the metatranscriptome assembly. For each fragment, the assembly length (bp) and best BLAST hit with**  
 32 **accession number for identification are shown.**

| Assembly                | Length (bp) | Reads | Best BLAST Hit                       | Identity | Accession Nr.  |
|-------------------------|-------------|-------|--------------------------------------|----------|----------------|
| 2729874199 <sup>a</sup> | 1455        | 21010 | <i>Candidatus</i> Electronema sp. GS | -        | TAA75457.1     |
| NODE_1035               | 1059        | 6476  | Ignavibacteria bacterium GWA2_35_8   | 50.42%   | OGU15306.1     |
| NODE_1697               | 843         | 1525  | Bacteroidales bacterium              | 63.70%   | RPH32637.1     |
| NODE_5700               | 471         | 504   | Bacterium BRH_c32                    | 80.38%   | KUO63373.1     |
| NODE_6090               | 423         | 345   | Ignavibacteriae bacterium HGW-1      | 71.01%   | PKL86473.1     |
| NODE_5479               | 480         | 304   | Ignavibacteriales bacterium          | 60.26%   | RJP63828.1     |
| NODE_8548               | 390         | 245   | Chloroflexi bacterium                | 71.32%   | KAA0272499.1   |
| NODE_22774              | 243         | 157   | <i>Draconibacterium orientale</i>    | 76.54%   | WP_038561595.1 |
| NODE_12207              | 330         | 148   | <i>Desulfosporosinus</i> sp. OL      | 86.36%   | WP_075365416.1 |
| NODE_22783              | 243         | 145   | Ignavibacteriae bacterium            | 71.60%   | MAT57261.1     |
| NODE_9233               | 378         | 145   | Bacteroidales bacterium 6E           | 76.19%   | WP_062081844.1 |
| NODE_10525              | 354         | 123   | Ignavibacteriales bacterium          | 76.67%   | KAB2881609.1   |
| NODE_48342              | 174         | 115   | Ignavibacteria bacterium             | 81.03%   | HFI71567.1     |
| NODE_23662              | 240         | 109   | Anaerolineaceae bacterium            | 85.00%   | RJP51273.1     |
| NODE_17382              | 279         | 86    | Anaerolineaceae bacterium            | 90.32%   | RJP51273.1     |
| NODE_16670              | 285         | 77    | Deltaproteobacteria bacterium        | 93.68%   | TSA47763.1     |
| NODE_18587              | 270         | 75    | <i>Bacteroides thetaiotaomicron</i>  | 73.33%   | WP_128832607.1 |
| NODE_59156              | 156         | 73    | Anaerolineaceae bacterium            | 92.31%   | RJP51273.1     |
| NODE_56775              | 162         | 72    | Bacteroidetes bacterium HGW-14       | 88.89%   | PKP38169.1     |
| NODE_48499              | 171         | 65    | Bacteroidetes bacterium HGW-20       | 67.86%   | PKP19544.1     |
| NODE_18190              | 273         | 64    | Geobacteraceae bacterium GWC2        | 92.22%   | OGU02519.1     |
| NODE_20849              | 255         | 61    | <i>Nitrospira</i> sp. ND1            | 74.12%   | WP_080880016.1 |
| NODE_59250              | 156         | 54    | Anaerolineaceae bacterium            | 66.67%   | RJP50667.1     |
| NODE_30190              | 216         | 49    | Desulfovibrionaceae bacterium CG1    | 90.28%   | OIO01983.1     |
| NODE_72988              | 144         | 49    | <i>Mariniphaga anaerophila</i>       | 75.00%   | WP_073001158.1 |
| NODE_20195              | 261         | 47    | <i>Desulfobacula</i> sp.             | 98.85%   | NJM01957.1     |
| NODE_42133              | 183         | 44    | Armatimonadetes bacterium            | 77.05%   | HAZ64043.1     |
| NODE_103826             | 120         | 44    | Verrucomicrobia bacterium            | 75.00%   | HGZ03587.1     |
| NODE_48665              | 174         | 41    | Chloroflexi bacterium                | 87.72%   | KAA0284799.1   |
| NODE_76761              | 138         | 40    | Bacteroidetes bacterium GWF2_40_14   | 95.65%   | OFY43517.1     |
| NODE_48080              | 171         | 36    | Bacteroidetes bacterium GWF2_49_14   | 87.72%   | OFY56707.1     |
| NODE_48149              | 174         | 33    | Bacteroidetes bacterium HGW-14       | 81.03%   | PKP38169.1     |
| NODE_80762              | 135         | 33    | Holophagaceae bacterium              | 93.33%   | HCZ34028.1     |
| NODE_43798              | 180         | 25    | <i>Mariniphaga anaerophila</i>       | 86.67%   | HDR50005.1     |
| NODE_85269              | 135         | 23    | Bacteroidetes bacterium GWF2_49_14   | 80.00%   | OFY56707.1     |
| NODE_96491              | 129         | 20    | <i>Desulfobulbus elongatus</i>       | 86.05%   | WP_028318537.1 |
| NODE_72356              | 144         | 18    | <i>Parabacteroides chartae</i>       | 89.58%   | WP_079683478.1 |

|             |     |    |                                  |        |                |
|-------------|-----|----|----------------------------------|--------|----------------|
| NODE_77293  | 141 | 17 | Prolixibacteraceae bacterium     | 91.30% | HAX97138.1     |
| NODE_52928  | 165 | 17 | Anaerolineaceae bacterium        | 90.91% | RJP51273.1     |
| NODE_109263 | 117 | 16 | <i>Sedimentibacter saalensis</i> | 97.44% | WP_145083802.1 |
| NODE_78515  | 138 | 16 | Holophagaceae bacterium          | 80.43% | HCZ34028.1     |

33 <sup>a</sup> The *nrfA*-HMM did not identify the octaheme cytochrome (pOCC) encoded in *Ca. Electronema* sp. GS as *nrfA*  
34 in the metatranscriptome assembly. The number of reads was therefore taken from mapping the transcriptome to  
35 the pOCC in the full genome of *Ca. Electronema* sp. GS.

36  
37  
38  
39  
40  
41  
42

**Table S7. Number of reads mapped to each of the 16 *nirK* gene fragments identified in the metatranscriptome assembly. For each fragment, the assembly length (bp) and best BLAST hit with accession number for identification are shown.**

| Assembly    | Length (bp) | Reads | Best BLAST Hit                        | Identity | Accession Nr.  |
|-------------|-------------|-------|---------------------------------------|----------|----------------|
| NODE_543    | 1440        | 2087  | Bacteroidetes bacterium               | 70.35%   | HCR49498.1     |
| NODE_5286   | 486         | 506   | <i>Pseudomonas aeruginosa</i>         | 99.37%   | WP_134611211.1 |
| NODE_13019  | 255         | 261   | <i>Turneriella parva</i>              | 84.51%   | WP_157210629.1 |
| NODE_10281  | 357         | 181   | <i>Methylothermobacter mobilis</i>    | 94.12%   | WP_019898664.1 |
| NODE_16623  | 285         | 171   | <i>Turneriella parva</i>              | 92.63%   | WP_157210629.1 |
| NODE_9189   | 378         | 102   | <i>Candidatus Nitrotoga</i> sp. SPKER | 97.62%   | RFC32878.1     |
| NODE_123633 | 108         | 52    | <i>Methylothermobacter mobilis</i>    | 100.00%  | WP_019898664.1 |
| NODE_43088  | 183         | 50    | Bacteroidetes bacterium               | 93.44%   | KAF0128322.1   |
| NODE_40578  | 144         | 45    | <i>Nitrosomonas</i> sp.               | 100.00%  | TXI16409.1     |
| NODE_69784  | 147         | 40    | Chloroflexi bacterium                 | 93.88%   | RPI92707.1     |
| NODE_101121 | 123         | 40    | <i>Candidatus Nitrotoga</i> sp. LAW   | 97.56%   | RFC35445.1     |
| NODE_111589 | 117         | 39    | <i>Candidatus Nitrotoga fabula</i>    | 97.44%   | SPS04597.1     |
| NODE_72142  | 144         | 35    | <i>Nitrosomonas</i> sp.               | 100.00%  | WP_110340319.1 |
| NODE_96242  | 126         | 33    | <i>Methylothermobacter mobilis</i>    | 97.62%   | WP_019898664.1 |
| NODE_125899 | 108         | 31    | <i>Turneriella parva</i> DSM 21527    | 100.00%  | AFM12745.1     |
| NODE_85775  | 132         | 16    | Chloroflexi bacterium                 | 95.45%   | KAA0276016.1   |

43

44 **Table S8. Number of reads mapped to each of the 63 *nirS* gene fragments identified in the**  
 45 **metatranscriptome assembly. For each fragment, the assembly length (bp) and best BLAST hit with**  
 46 **accession number for identification are shown.**

| Assembly    | Length (bp) | Reads | Best BLAST Hit                        | Identity | Accession nr.  |
|-------------|-------------|-------|---------------------------------------|----------|----------------|
| NODE_249    | 1659        | 14524 | Rhodocyclaceae bacterium              | 79.14%   | KAB2931495.1   |
| NODE_1159   | 1008        | 11681 | <i>Magnetospirillum</i> sp. XM-1      | 98.21%   | WP_068432955.1 |
| NODE_3104   | 531         | 8195  | <i>Magnetospirillum</i> sp. XM-1      | 98.86%   | WP_068432955.1 |
| NODE_580    | 1380        | 5929  | <i>Sulfurimonas</i> sp. rificsphingho | 98.26%   | OHD96676.1     |
| NODE_709    | 1272        | 5193  | <i>Sulfurimonas</i> sp. RIFOXYB12     | 97.64%   | OHE03859.1     |
| NODE_389    | 1644        | 4673  | <i>Sulfuricella denitrificans</i>     | 86.73%   | WP_009206840.1 |
| NODE_536    | 1344        | 4408  | Bacteroidetes bacterium               | 65.22%   | HGZ30921.1     |
| NODE_3454   | 573         | 2518  | Rhodospirillaceae bacterium           | 86.84%   | KAF0222361.1   |
| NODE_363    | 1726        | 2491  | <i>Sulfuricella denitrificans</i>     | 87.45%   | WP_009206840.1 |
| NODE_9353   | 372         | 2241  | <i>Sulfuricella</i> sp. T08           | 87.10%   | WP_059423846.1 |
| NODE_1325   | 924         | 2192  | <i>Sulfurimonas</i> sp. RIFCSPHIGHO2  | 98.38%   | OHD96676.1     |
| NODE_116143 | 111         | 2078  | Rhodocyclaceae bacterium UTPRO2       | 91.89%   | OQY75115.1     |
| NODE_2019   | 775         | 1752  | <i>Sulfurimonas</i> sp. RIFCSPHIGHO2  | 98.51%   | OHD96676.1     |
| NODE_1206   | 987         | 1649  | Gallionellaceae bacterium             | 89.67%   | TXT25620.1     |
| NODE_9592   | 369         | 1615  | <i>Sulfurimonas</i> sp. RIFCSPHIGHO2  | 97.56%   | OHE03859.1     |
| NODE_5013   | 498         | 1512  | Nitrosomonadales bacterium skT11      | 91.57%   | BCB27672.1     |
| NODE_1811   | 816         | 1487  | <i>Sulfurimonas</i> sp. RIFCSPHIGHO2  | 100.00%  | OHE03859.1     |
| NODE_3274   | 609         | 1357  | Rhodocyclaceae bacterium UTPRO2       | 87.19%   | OQY75115.1     |
| NODE_482    | 1521        | 1271  | <i>Sulfuricella denitrificans</i>     | 87.84%   | WP_009206840.1 |
| NODE_993    | 600         | 1125  | <i>Sulfurimonas</i> sp. RIFCSPHIGHO2  | 98.50%   | OHD96676.1     |
| NODE_740    | 603         | 1121  | <i>Sulfurimonas</i> sp. RIFCSPHIGHO2  | 98.51%   | OHD96676.1     |
| NODE_2511   | 696         | 1083  | Rhodocyclaceae bacterium UTPRO2       | 88.36%   | OQY75115.1     |
| NODE_18486  | 255         | 904   | Gallionellaceae bacterium             | 97.62%   | TNC95217.1     |
| NODE_3126   | 624         | 654   | <i>Ideonella</i> sp. A 288            | 93.75%   | WP_088280822.1 |
| NODE_3293   | 606         | 612   | Gallionellaceae bacterium             | 96.04%   | TNC95217.1     |
| NODE_3112   | 600         | 566   | <i>Sulfurimonas</i> sp. RIFOXYB12     | 96.00%   | OHE03859.1     |
| NODE_4772   | 513         | 560   | Gallionellaceae bacterium             | 97.66%   | TNC95217.1     |
| NODE_980    | 1101        | 493   | <i>Sulfuricella denitrificans</i>     | 84.32%   | WP_009206840.1 |
| NODE_5258   | 327         | 492   | <i>Gallionella</i> sp.                | 90.74%   | TAN85400.1     |
| NODE_4190   | 543         | 448   | Gallionellaceae bacterium             | 90.61%   | TNC95217.1     |
| NODE_14620  | 303         | 441   | Rhodocyclaceae bacterium UTPRO2       | 94.06%   | OQY75115.1     |
| NODE_2435   | 615         | 424   | <i>Sulfuricurvum kujiense</i>         | 76.47%   | WP_013461204.1 |
| NODE_51574  | 165         | 405   | <i>Magnetospirillum</i> sp. ME-1      | 83.64%   | WP_085374872.1 |
| NODE_10008  | 315         | 379   | Rhodocyclaceae bacterium              | 93.27%   | KAB2931495.1   |

|             |     |     |                                             |         |                |
|-------------|-----|-----|---------------------------------------------|---------|----------------|
| NODE_17055  | 282 | 378 | <i>Extensimonas perlucida</i>               | 89.36%  | WP_144735445.1 |
| NODE_1315   | 459 | 363 | <i>Sulfurimonas</i> sp. RIFOXYB12           | 94.77%  | OHE03859.1     |
| NODE_3039   | 459 | 357 | <i>Sulfurimonas</i> sp. RIFOXYB12           | 94.77%  | OHE03859.2     |
| NODE_978    | 459 | 350 | <i>Sulfurimonas</i> sp. RIFOXYB12           | 94.77%  | OHE03859.3     |
| NODE_80248  | 138 | 235 | uncultured bacterium                        | 100.00% | ANQ68160.1     |
| NODE_16986  | 240 | 130 | <i>Curvibacter delicatus</i>                | 76.25%  | WP_066710706.1 |
| NODE_60746  | 153 | 113 | <i>Sphaerotilus hippiei</i>                 | 100.00% | WP_110402103.1 |
| NODE_59881  | 156 | 111 | <i>Sulfuricella</i> sp. T08                 | 84.62%  | WP_059423846.1 |
| NODE_27254  | 225 | 101 | uncultured bacterium                        | 84.00%  | AWJ69776.1     |
| NODE_66350  | 150 | 93  | uncultured bacterium                        | 100.00% | ALE65713.1     |
| NODE_49032  | 171 | 91  | Rhodocyclales bacterium GWA2                | 100.00% | OHC64126.1     |
| NODE_40843  | 186 | 81  | Rhodocyclales bacterium                     | 93.55%  | PWB40471.1     |
| NODE_102220 | 120 | 74  | Gallionellaceae bacterium CG1               | 100.00% | OIO75741.1     |
| NODE_89030  | 129 | 69  | Rhodocyclaceae bacterium UTPRO2             | 93.02%  | OQY75115.1     |
| NODE_44058  | 180 | 69  | Nitrosomonadales bacterium skT11            | 91.67%  | BCB27672.1     |
| NODE_65734  | 150 | 69  | <i>Magnetospirillum</i> sp. ME-1            | 92.00%  | WP_085374872.1 |
| NODE_2798   | 132 | 63  | Rhodocyclaceae bacterium UTPRO2]            | 86.13%  | OQY75115.1     |
| NODE_58464  | 159 | 59  | <i>Dechloromonas</i> sp. H13                | 96.23%  | WP_153145771.1 |
| NODE_43211  | 180 | 49  | uncultured bacterium                        | 100.00% | AHZ56195.1     |
| NODE_76577  | 141 | 49  | uncultured bacterium                        | 91.49%  | AHZ56205.1     |
| NODE_100448 | 123 | 43  | Nitrosomonadales bacterium skT11            | 95.74%  | BCB27672.1     |
| NODE_76804  | 141 | 38  | <i>Sulfuricella</i> sp. T08                 | 95.74%  | WP_059423846.1 |
| NODE_79472  | 138 | 33  | <i>Magnetospirillum magneticum</i> AMB-1    | 95.65%  | BAE52969.1     |
| NODE_82237  | 138 | 32  | uncultured bacterium                        | 93.48%  | BAD37160.1     |
| NODE_53350  | 141 | 32  | <i>Magnetospirillum magneticum</i>          | 100.00% | WP_148207685.1 |
| NODE_2441   | 141 | 30  | <i>Batrachochytrium dendrobatidis</i> JAM81 | 83.33%  | XP_006681176.1 |
| NODE_59724  | 159 | 21  | Betaproteobacteria bacterium                | 84.91%  | TAK41309.1     |
| NODE_122668 | 108 | 21  | Deltaproteobacteria bacterium HGW           | 94.44%  | PKN14918.1     |
| NODE_65216  | 153 | 12  | uncultured organism                         | 80.39%  | AAN60890.1     |
